# Supplementary material for: Nanostructured silver decorated hollow silica and their application in the treatment of microbial contaminated water at room temperature
Source: Royal Society of Chemistry journal article supplement (doi:10.1039/c9nj01049a), 2019-01-01
Supplement: c9nj01049a1.pdf [file c9nj01049a1.pdf]

## Supporting Information

### Nanostructured silver decorated hollow silica and their application in treatment of microbial contaminated water at room temperature

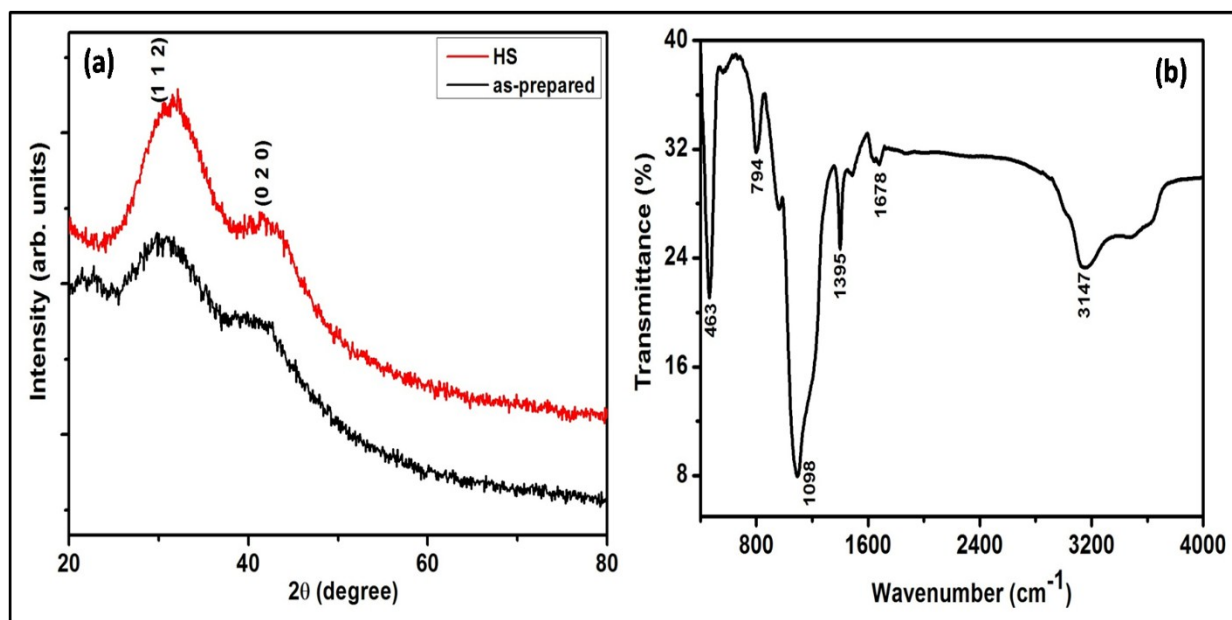

Figure S1: (a) XRD pattern of as-prepared and calcined hollow silica and (b) FTIR spectrum of calcined hollow silica.

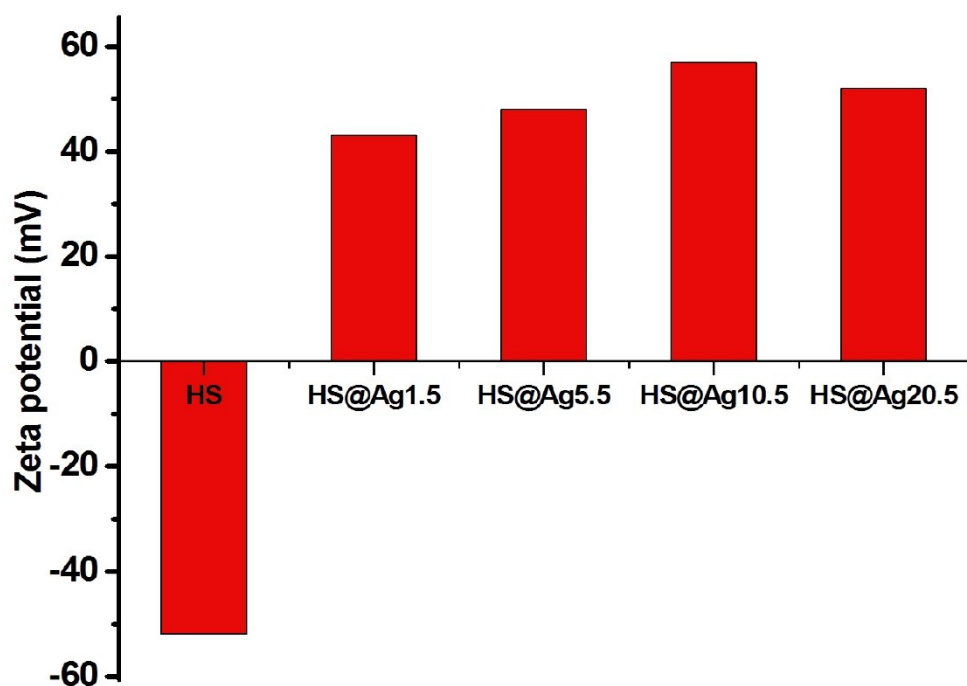

Fig. S2: Zeta potential measurements of synthesized hollow silica and silver decorated hollow silica samples.

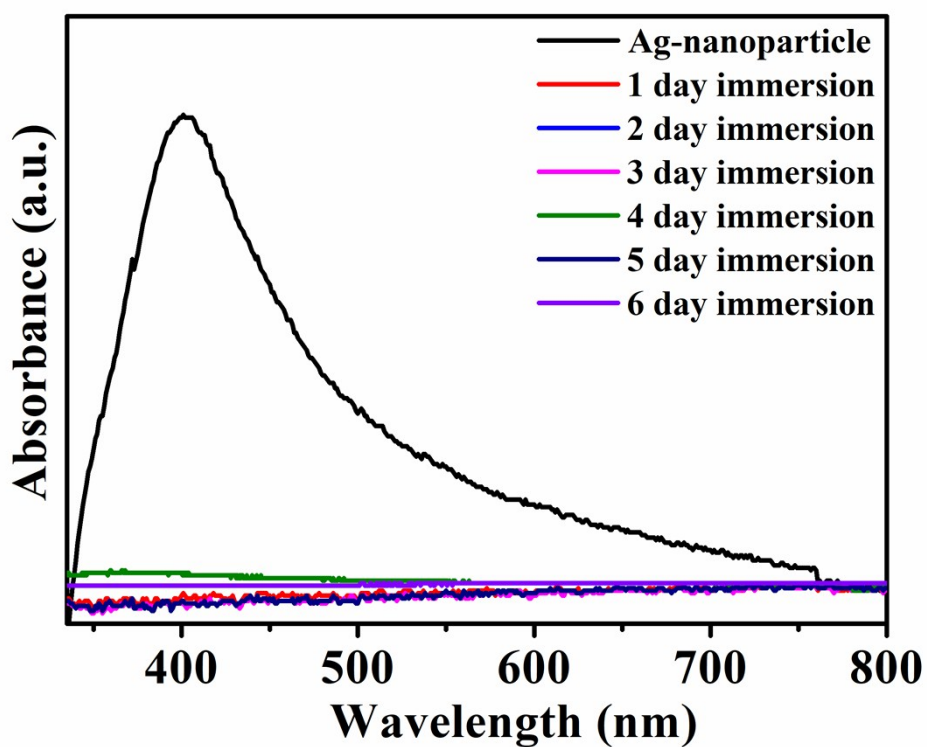

Figure S3: UV spectra for release of silver nanoparticle in water as function of time

**Table S1: Silica and Silver release test of HS@Ag5.5**

| <b>Element</b>          | <b>day0</b> | <b>day1</b> | <b>day2</b> | <b>day3</b> | <b>day4</b> | <b>day5</b> | <b>day6</b> |
|-------------------------|-------------|-------------|-------------|-------------|-------------|-------------|-------------|
| <b>Silica<br/>(ppm)</b> | 1.03        | 1.09        | 1.98        | 2.07        | 2.72        | 3.13        | 3.20        |
| <b>Silver<br/>(ppm)</b> | 0.20        | 0.21        | 0.21        | 0.29        | 0.21        | 0.20        | 0.20        |
